# Supplementary material
Source: PubMed Central journal article supplement (PMC7519324)
Supplement: pnas.2008283117.sapp.pdf [file pnas.2008283117.sapp.pdf]

## Supplementary Information

### **MAC5, an RNA-binding protein, protects pri-miRNAs from SERRATE-dependent exoribonuclease activities**

Shengjun Li<sup>1,2,5</sup>, Mu Li<sup>1,5</sup>, Kan Liu<sup>1</sup>, Huimin Zhang<sup>3</sup>, Shuxin Zhang<sup>4</sup>, Chi Zhang<sup>1</sup>, and Bin Yu<sup>1\*</sup>

<sup>1</sup>School of Biological Sciences & Center for Plant Science Innovation University of Nebraska-Lincoln, Lincoln, Nebraska 68588-0666, USA

<sup>2</sup> Current Address: Key Laboratory of Biofuels, Shandong Provincial Key Laboratory of Energy Genetics, Shandong Institute of Energy Technology, Qingdao Institute of Bioenergy and Bioprocess Technology, Chinese Academy of Sciences, Qingdao 266101, China

<sup>3</sup>Key Laboratory of Biofuels, Shandong Provincial Key Laboratory of Energy Genetics, Shandong Institute of Energy Technology, Qingdao Institute of Bioenergy and Bioprocess Technology, Chinese Academy of Sciences, Qingdao 266101, China

<sup>4</sup>State Key Laboratory of Crop Biology, College of Life Sciences, Shandong Agricultural University, Taian, Shandong 271018, China

<sup>5</sup>:Equal contribution

\*: Corresponding author:

Bin Yu

Tel: 402-472-2125

Fax: 402-472-3139

Email: [byu3@unl.edu](mailto:byu3@unl.edu)

**This PDF file contains**

**Figures S1-S10**

**Table S1**

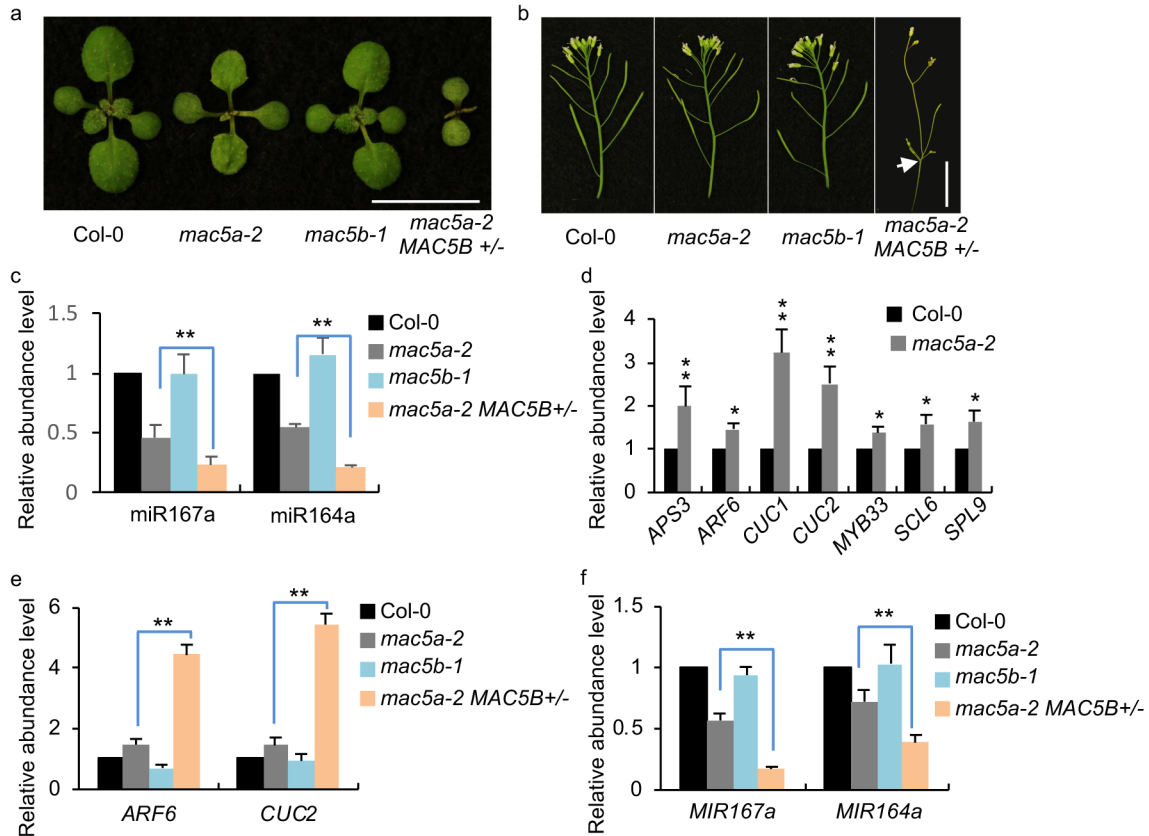

**Figure S1. *MAC5A* and *MAC5B* act redundantly in miRNA accumulation.** **a** and **b**, Phenotypes of 14d-old seedlings (**a**) and inflorescences (**b**). Bar = 1 cm. White arrow indicates the clustered inflorescence architecture. **c**, The abundance of miR167a and miR164a in the indicated plants detected by Quantitative RT-PCR (qRT-PCR). The values in Col-0 were set as 1. \*\*  $P < 0.01$  by student's *t* test compared with *mac5a-2* value. **d**, The abundance of miRNA targets in the Col-0 and *mac5a-2*. The values in Col-0 were set as 1. \*  $P < 0.05$  and \*\*  $P < 0.01$  by student's *t* test compared with Col-0 value. **e**, The abundance of *ARF6* and *CUC2* in the indicated plants detected by qRT-PCR. The values in Col-0 were set as 1. \*\*  $P < 0.01$  by student's *t* test compared with *mac5a-2* value. **f**, The abundance of pri-miR167a and pri-miR164a in the indicated plants detected by qRT-PCR. The values in Col-0 were set as 1. \*\*  $P < 0.01$  by student's *t* test compared with *mac5a-2* value. The values in Col-0 were set as 1. \*\*  $P < 0.01$  by student's *t* test compared with *mac5a-2* value.

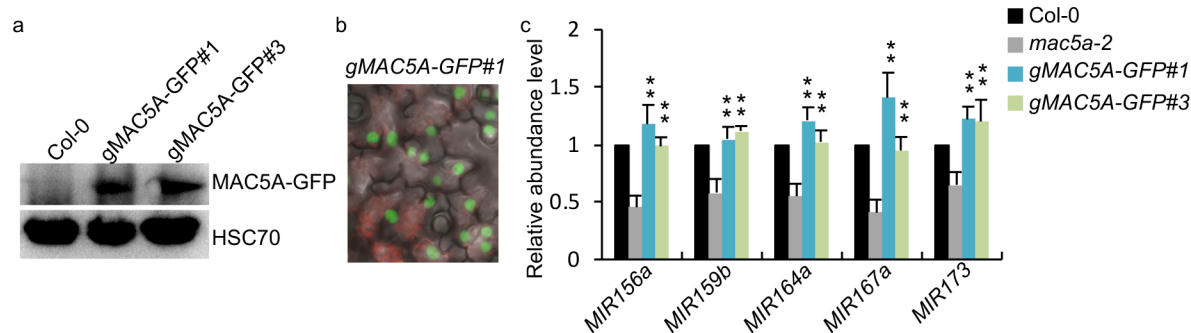

**Figure S2. Complementation of *mac5a*.** **a**, MAC5A-GFP protein expression in two transgenic lines in the *mac5a-2* background detected by western blot. HSC70 serves as the loading control. **b**, The MAC5-GFP protein in the transgenic plants harboring *gMAC5A-GFP* detected by confocal microscopy. **c**, Detection of pri-miRNA expression levels in the complementary lines by qRT-PCR. The values in Col-0 were set as 1. \*\* P<0.01 by student's *t* test compared with *mac5a-2* value.

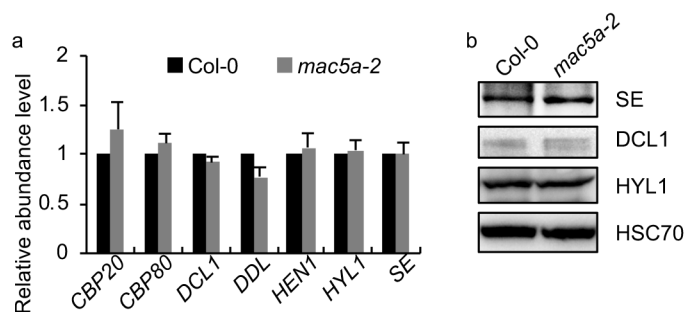

**Figure S3. MAC5A does not influence the expression of several genes required for miRNA biogenesis.** **a**, The transcript levels of genes involved in miRNA biogenesis detected by qRT-PCR. **b**, The protein levels of SE, DCL1, and HYL1. HSC70 serves as the loading control.

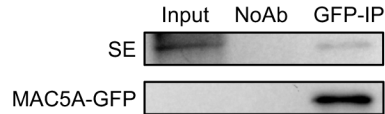

**Figure S4. The interaction between MAC5A and SE in Arabidopsis.** Total proteins were extracted in transgenic plants harboring *gMAC5A-GFP*. IP was performed using anti-GFP antibodies. After IP, SE and MAC5A-GFP proteins were detected by immunoblot using anti-SE and anti-GFP antibodies, respectively. NoAb means no antibody negative control.

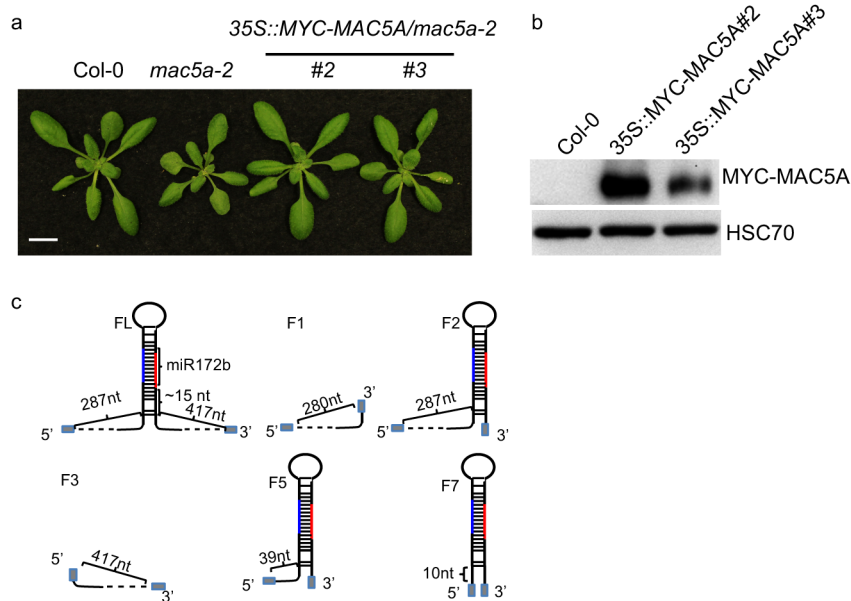

**Figure S5. The interaction between MAC5A with *MIR172b*.** **a**, Phenotype of 4-week old seedlings of transgenic plants harboring *p35S::MYC-MAC5A* in the *mac5a-2* background. Bar: 1 cm. **b**, MYC-MAC5A protein expression in the transgenic *mac5a-2* harboring *p35S::MYC-MAC5A*. HSC70 serves as the loading control. **c**, Diagrams of various *MIR172b* transcripts used for RNA-binding assay. Gray boxes indicate the sequence from vectors. miR172b is shown in red; miR172b\* is shown in blue.

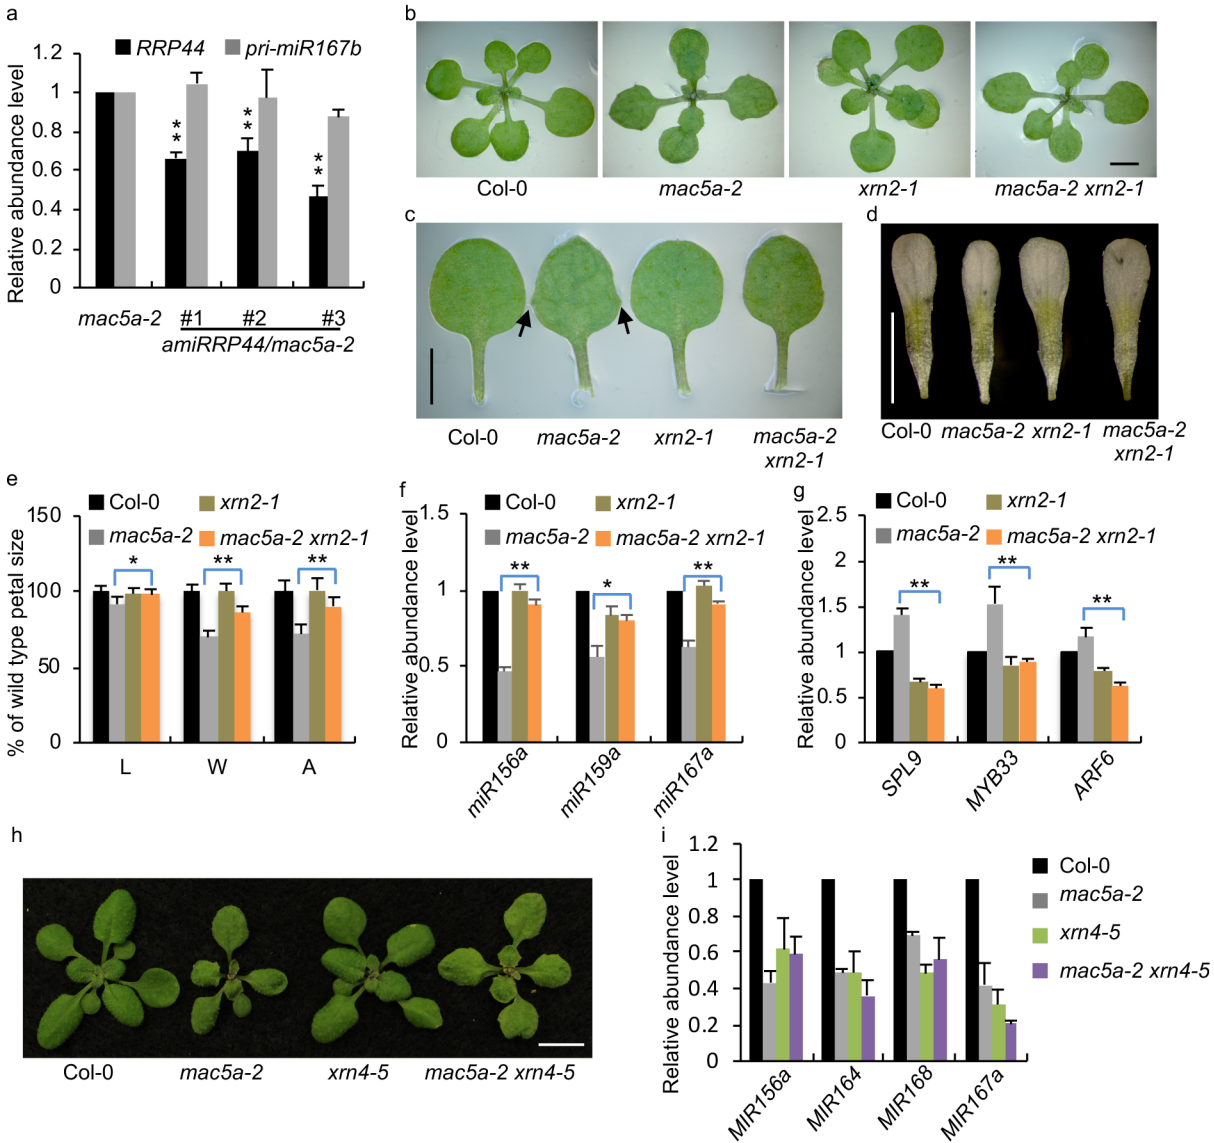

**Figure S6. MAC5 protects pri-miRNAs from 5'-to-3' degradation of pri-miRNAs.** **a**, qRT-PCR analysis of the mRNA level of *RRP44* and *pri-miR167b* in the three transgenic lines. **b-d**, Phenotypes of 14d-old seedlings (**b**), first-pair true leaves (**c**), and petals (**d**) in the indicated plants. *mac5a-2* displays the leaf tooth phenotype in the margin marked by black arrows that is suppressed in *mac5a-2 xrn2-1* double mutant. **e**, Statistic analysis of petal length (L), petal width (W), and petal area (A) in the indicated plants. The values of Col-0 were set as 100. **f** and **g**, Relative abundance levels of mature miR156a, miR159a and miR167a and their targets *SPL9*, *MYB33* and *ARF6* detected by qRT-PCR in the indicated plants. **h**, Phenotype of 3-week old plants. **i**, Relative abundance levels of pri-miRNA in the indicated plants. \*  $P < 0.05$  and \*\*  $P < 0.01$  by student's *t* test compared with *mac5a-2* value. Bars: 2 mm in **b-d**, 1 cm in **h**.

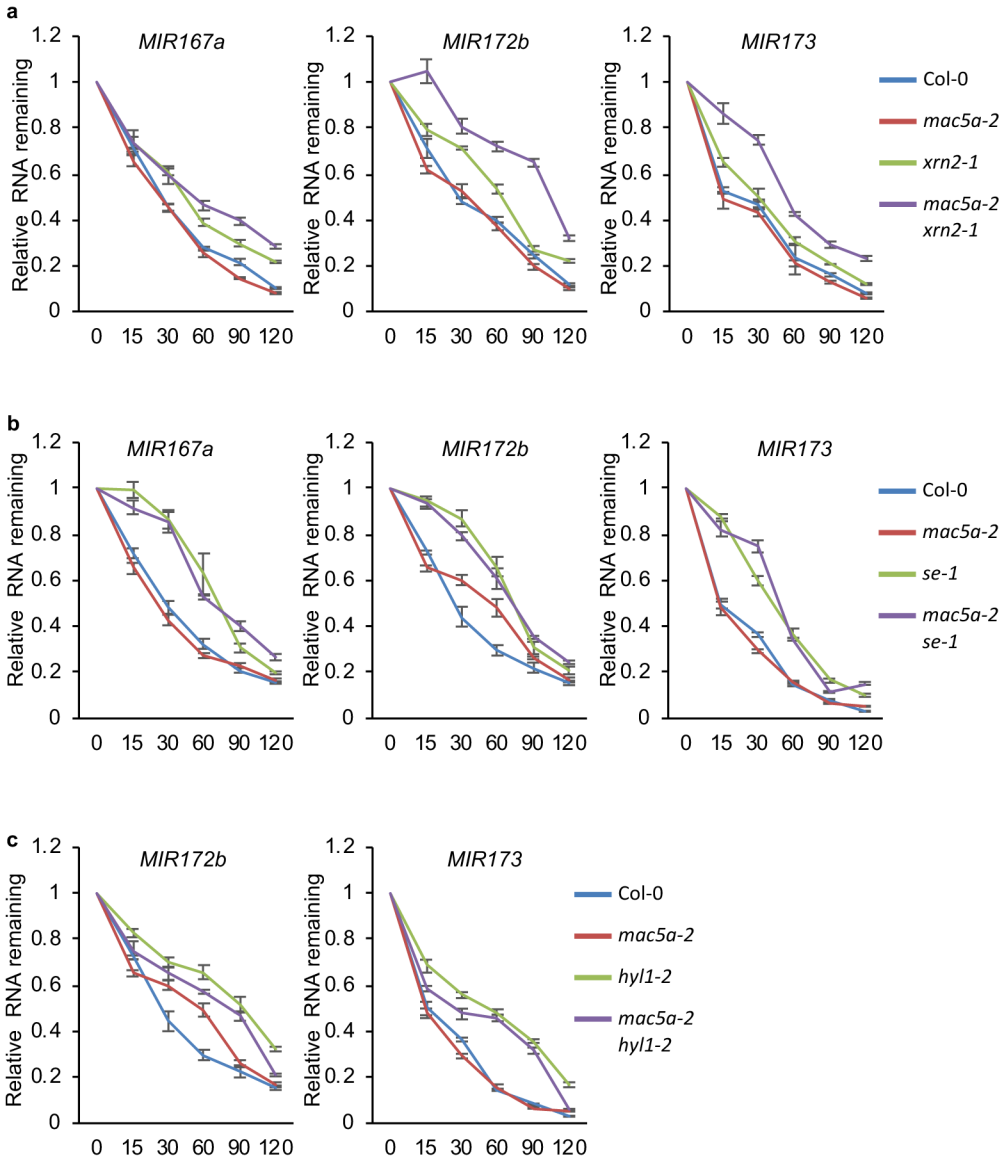

**Figure S7. RNA decay analyses to determine the RNA stability. a**, pri-miRNA half-life analysis in Col-0, *mac5a-2*, *xrn2-1* and *mac5a-2 xrn2-1*. **b**, pri-miRNA half-life analysis in Col-0, *mac5a-2*, *se-1*, and *mac5a-2 se-1*. **c**. pri-miRNA half-life analysis in Col-0, *mac5a-2*, *hyl1-2* and *mac5a-2 hyl1-2*. 7-day old seedlings were treated with 0.6 mM 3'-deoxyadenosine (Cordycepin, Sigma) at various times (0, 15, 30, 60, 90 and 120 minutes). qRT-PCR was performed to examine RNA abundances in the indicated plants. The values were normalized to the internal control (EIF4a) that is not affected by Cordycepin reagent. Values of time 0 were set as 1. Error bars indicate standard deviation of three technical replications.

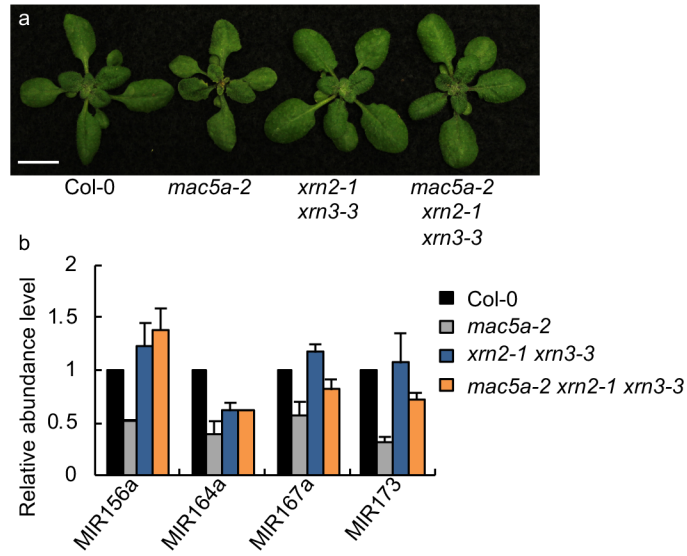

**Figure S8. Genetic analysis of *mac5a-2*, *xrn2-1*, and *xrn3-3*.** **a**, Phenotypes of 4-week old plants. Bar: 1 cm. **b**, qRT-PCR analysis of the abundance of pri-miRNAs. pri-miRNA levels were normalized to those of UBQ5 and the values in wild-type were set as 1. Error bars indicate SD of three replicates.

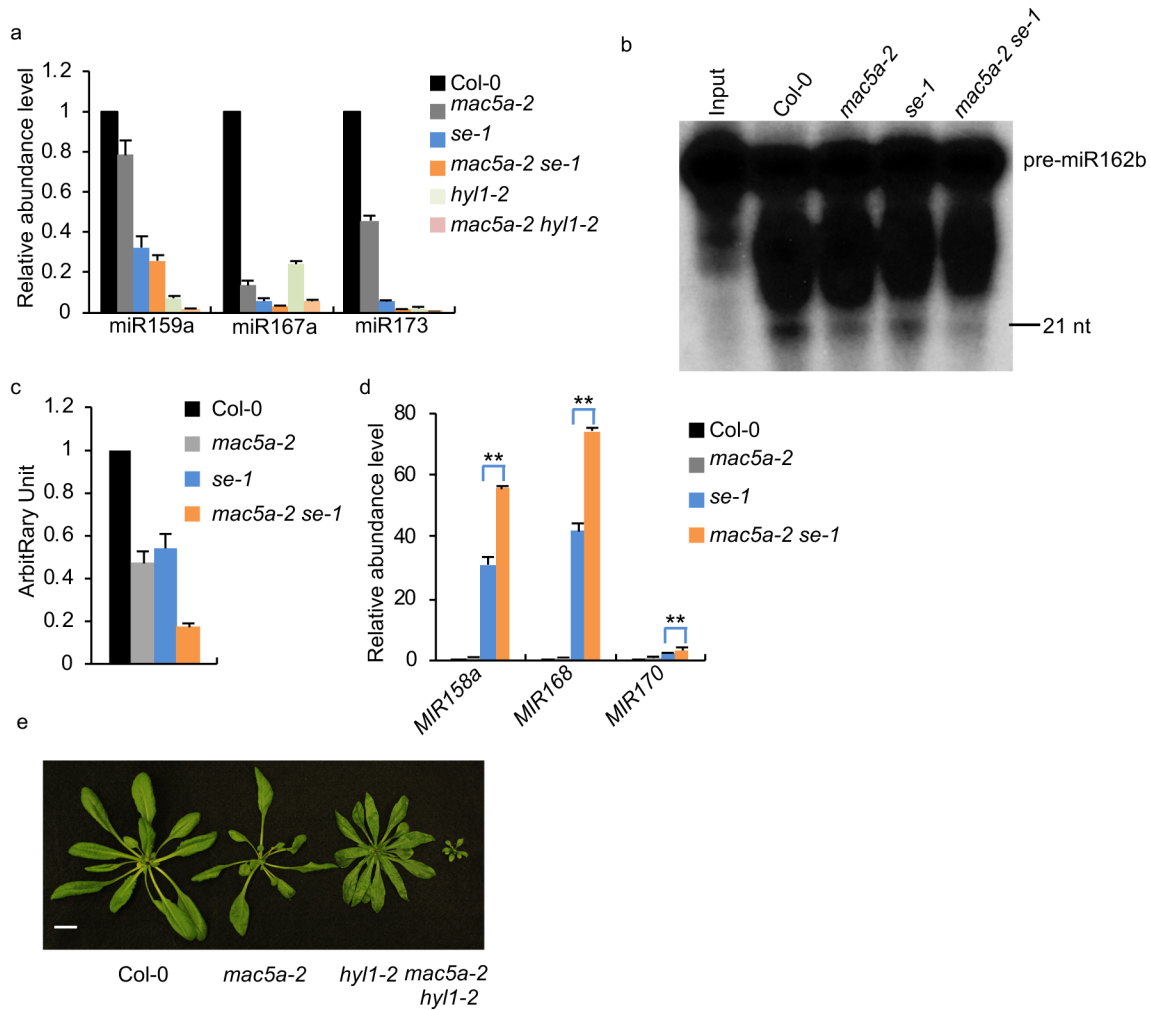

**Figure S9. MAC5A, SE, and HYL1 synergistically regulate miRNA processing and plant development.** **a**, miRNA abundance detected by qRT-PCR in the indicated plants. **b**, pre-miR162b processing assay using protein extracts from the indicated plants. **c**, Quantification of miRNA production (the value in Col-0 was set as 1). **d**, qRT-PCR analysis of pri-miRNA abundance in Col-0, *mac5a-2*, *se-1*, and *mac5a-2 se-1*. **e**, 30d-old seedlings of Col-0, *mac5a*, *hyl1*, and *mac5a hyl1*. Bar: 1 cm.



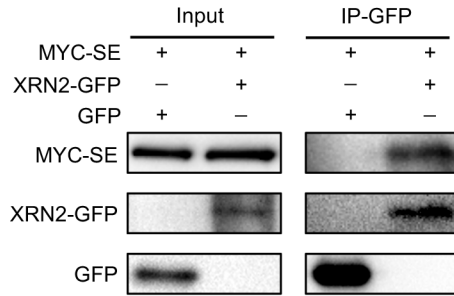

**Figure S10. Co-IP shows the interactions between SE and XRN2.** XRN2-GFP and GFP were co-expressed with MYC-SE in *N. Benthamiana*. IP was performed using anti-GFP antibodies. MYC-SE, XRN2-GFP, and GFP were detected by immunoblot.

**Table S1: DNA oligos used in this study.**

| Name                             | Sequence                                                | Application                   |
|----------------------------------|---------------------------------------------------------|-------------------------------|
| <b>Primers for genotyping</b>    |                                                         |                               |
| salk_142085LP                    | ATGGACATTCAGCACCTCTTG                                   | <i>mac5a-2</i>                |
| salk_142085RP                    | TCTAAGCTATTTGGTTCCCGC                                   |                               |
| GK_419F11LP                      | CAGCTTCAACACTAAGAAAC                                    | <i>mac5b-1</i>                |
| GK_419F11RP                      | TAGAGTGTGGATCGAAACGG                                    |                               |
| se-1F                            | TGCCCTTTTCTGTTGCTC                                      | <i>se-1</i>                   |
| se-1R                            | GGTAATGGACTCATAGCACAGA                                  |                               |
| hyl1-2F                          | AGTTCTCCCAGCGCTAATCTC                                   | <i>hyl1-2</i>                 |
| hyl1-2R                          | TTCTTGGAAATTGGATTGCAG                                   |                               |
| salk_041148 LP                   | CTTGAGATCTGATGCGAAAGG                                   | <i>xrn2-1</i>                 |
| salk_041148 RP                   | GTCATCTCGTATCCGAGGAGG                                   |                               |
| xrn3-3 LP                        | GCCTTCGATTTCAACAGGC                                     | <i>xrn3-3</i>                 |
| xrn3-3 RP                        | GAAATCGAACACAAATCCG                                     |                               |
| xrn4-5 LP                        | GTTTCTTGGTTGTTGCAGCTC                                   | <i>xrn4-5</i>                 |
| xrn4-5 RP                        | TCATGACGAATTCCTTTGAGG                                   |                               |
| LBa1                             | TGGTTCACGTAGTGGGCCATCG                                  | T-DNA                         |
| LB1                              | GCCTTTTCAGAAATGGATAAATAGCCTTGCTTCC                      | T-DNA                         |
| <b>Primers for constructs</b>    |                                                         |                               |
| proMAC5A-1F                      | CACCCGGTTCCAATGTCACCGGCAG                               | MAC5A genomic DNA             |
| MAC5Acds-1R                      | CTGAGACGAACCAGTAGCTGTA                                  | MAC5A genomic or CDS sequence |
| MAC5Acds-1F                      | CACC ATGGCTCACAGAATACTGAGA                              | MAC5A CDS sequence            |
| XRN2cds-1F                       | CACCATGGGAGTTCGGTCGTTCTAC                               | XRN2 CDS sequence             |
| XRN2cds-1R                       | AGCTGTTTTGGGAGGAGCTCC                                   | XRN2 CDS sequence             |
| MAC5A-2F(Sal1)                   | ACGCGTCGACATGGCTCACAGAATACTGAGA                         | BiFC                          |
| MAC5A-2R(Pst1)                   | AACTGCAG CTACTGAGACGAACCAGTAGC                          | BiFC                          |
| MAC5A-3F(Not1)                   | ATGCGGCCGCATGGCTCACAGAATACTGAGA                         | MBP-MAC5A                     |
| MAC5A-3R(Sal1)                   | GCGTCGACCTACTGAGACGAACCAGTAGC                           | MBP-MAC5A                     |
| XRN2cds-1F                       | CACC ATGGGAGTTCGGTCGTTCTAC                              | XRN2-GFP                      |
| XRN2cds-1R                       | AGCTGTTTTGGGAGGAGCTCC                                   | XRN2-GFP                      |
| <b>Primers for stem-loop PCR</b> |                                                         |                               |
| miR159a stemloop RT              | GTTGGCTCTGGTGCAGGGTCCGAGGTATTCGCACCAGAGC<br>CAACTAGAGC  | stem-loop PCR                 |
| miR159a stemloop forward         | CGGCGGTTTGGATTGAAGGGA                                   | stem-loop PCR                 |
| miR161 stemloop RT               | GTTGGCTCTGGTGCAGGGTCCGAGGTATTCGCACCAGAGC<br>CAACACCCCG  | stem-loop PCR                 |
| miR161 Forward                   | CGGCGG TGAAAGTGACTACAT                                  | stem-loop PCR                 |
| miR167a stem-loop RT             | GTTGGCTCTGGTGCAGGGTCCGAGGTATTCGCACCAGAGC<br>CA ACTAGATC | stem-loop PCR                 |
| miR167a Forward                  | GGCGTC TGAAGCTGCCAGCAT                                  | stem-loop PCR                 |
| miR169i stem-loop RT             | GTTGGCTCTGGTGCAGGGTCCGAGGTATTCGCAC<br>CAGAGCCAACCAGGCA  | stem-loop PCR                 |
| miR169i forward                  | GGCGTC TAGCCAAGGATGACT                                  | stem-loop PCR                 |
| miR173 stem-loop RT              | GTTGGCTCTGGTGCAGGGTCCGAGGTATTCGCAC<br>CAGAGCCA ACGTGATT | stem-loop PCR                 |
| miR173 forward                   | GTTGGC TTCGCTTGACAGAGAG                                 | stem-loop PCR                 |
| U6 stem-loop RT                  | GTGCAGGGTCCGAGGTTTTGGACCATTTCTCGAT                      | stem-loop PCR                 |

|                                         |                               |               |
|-----------------------------------------|-------------------------------|---------------|
| U6 forward                              | GGAACGATACAGAGAAGATTAGCA      | stem-loop PCR |
| Universal                               | GTGCAGGGTCCGAGGT              | stem-loop PCR |
| <b>Probe sequence for Northern blot</b> |                               |               |
| miR156                                  | GTGCTCACTCTCTTCTGTCA          | Northern blot |
| miR319/159                              | GGG+AGC+TCC+CTT+CAG+TCC+AA    | Northern blot |
| miR164                                  | TGCACGTGCCCTGCTTCTCCA         | Northern blot |
| miR166                                  | GG+GGA+ATG+AAG+CCT+GGT+CCG+T  | Northern blot |
| miR171                                  | G+ATA+TTG+GCG+CGG+CTC+AAT+CA  | Northern blot |
| miR390                                  | G+GCG+CTA+TCC+CTC+CTG+AGC+TT  | Northern blot |
| miR169                                  | T+CGG+CAA+GTC+ATC+CTT+GGC+TG  | Northern blot |
| miR167                                  | T+AGA+TCA+TGT+TGG+CAG+TTT+CA  | Northern blot |
| miR173                                  | G+TGA+TTT+CTC+TCT+CGA+AGC+GAA | Northern blot |
| U6                                      | TCATCCTTGCGCAGGGGCCA          | Northern blot |
| <b>Primers for RT-PCR</b>               |                               |               |
| qAPS3-1F                                | GCGGCGGATTTGCCGAGAGT          | RT-PCR        |
| qAPS3-1R                                | CCCACGAAGAGGACTAGCCCAAC       | RT-PCR        |
| qARF6-1F                                | GGGGTCCTTTGGTAGGTCGC          | RT-PCR        |
| qARF6-1R                                | CGGCCAGGGGTCATCACCAA          | RT-PCR        |
| CUC1qF                                  | CGCCTTGACGGCAAATTTCTCTTAC     | RT-PCR        |
| CUC1qR                                  | GATGATCGGAGCAATTGCAGAACC      | RT-PCR        |
| qCUC2-1F                                | GGAGGAGGAGGAGCAACTGTGAG       | RT-PCR        |
| qCUC2-1R                                | GAGTGAGACGGAGGAAGGAGAGC       | RT-PCR        |
| qSPL9-F                                 | CAAGGTTTCAGTTGGTGGAGGA        | RT-PCR        |
| qSPL9-R                                 | TGAAGAAGCTCGCCATGTATTG        | RT-PCR        |
| DCL1 qF                                 | CGTTGTTATGCGTTTCGACCTTGC      | RT-PCR        |
| DCL1 qR                                 | AACGCTGCGTGAGATACATTTCCCTC    | RT-PCR        |
| HYL1 qF                                 | TTGCCTGGATTCTTCAATCGTAAGG     | RT-PCR        |
| HYL1 qR                                 | TAGGTTCTTGCATAATCCCGTTTCG     | RT-PCR        |
| SE qF                                   | CCACCGCCTCGTAGGGATTACA        | RT-PCR        |
| SE qR                                   | CCACCATGGTCATACCCAAATCTTC     | RT-PCR        |
| DDLqF                                   | ATGAGCCCCCAGAGGCTAGAAAAC      | RT-PCR        |
| DDLqR                                   | CTGCAAGATGGGTGATCCGTAGGAA     | RT-PCR        |
| CBP20qF                                 | ACCGGCCTATTCGTGTGGATTTTG      | RT-PCR        |
| CBP20qR                                 | TGCCTTTGTGCTTCGAGTTCCTTC      | RT-PCR        |
| CBP80qF                                 | TCTGGCAACTGCAACAGTATCCGTA     | RT-PCR        |
| CBP80qR                                 | GGCAGCAGATGATAGCAATGTTTCG     | RT-PCR        |
| HEN1 qF                                 | TTAGGATGACACCCCTGATGCTG       | RT-PCR        |
| HEN1 qR                                 | AAAAGCCGCCTCCATTCGTTCTTC      | RT-PCR        |
| MIR156a qF                              | AAGGGGGTCTTCTATCATCAGGA       | RT-PCR        |
| MIR156a qR                              | TGATTGGAATATGCCCTAAAGAGTG     | RT-PCR        |
| MIR156b qF                              | GAGAGATGGTGATTGAGGAATGC       | RT-PCR        |
| MIR156b qR                              | CAGAGATAGGCAACTGACAGAAAGAG    | RT-PCR        |
| MIR158a qF                              | GTGATGACGCCATTGCTCTTT         | RT-PCR/RIP    |
| MIR158a qR                              | TGTGACTTTAGATGCCCTTGTTCA      | RT-PCR/RIP    |
| MIR159a-F                               | TCAGGAGCTTTAACTTGCCCTTT       | RT-PCR        |
| MIR159a-R                               | CACGCTAAACATTGCTTCGGAAT       | RT-PCR        |
| MIR164a-F                               | CCCTCATGTGCTTGGAATG           | RT-PCR        |
| MIR164a-R                               | GCAAATGAGACGGATTCGTTG         | RT-PCR        |
| pri-miR166a-F                           | GACTCTGGCTCGCTCTATTCA         | RT-PCR        |
| pri-miR166a-R                           | TGGTCCGAAGACGCTAAAAC          | RT-PCR        |
| MIR167a qF                              | TGTTGTGTTTCATGACGATGG         | RT-PCR/RIP    |
| MIR167a qR                              | AGCTCACAAAATCAGACTGAAGA       | RT-PCR/RIP    |
| MIR167b qF                              | TCCACAAGGGAACAAGTGAA          | RT-PCR/RIP    |

|                                                |                                                                        |                   |
|------------------------------------------------|------------------------------------------------------------------------|-------------------|
| MIR167b qR                                     | TTTCTTTCAATCGGCATGTG                                                   | RT-PCR/RIP        |
| MIR172b-qF                                     | GTAGGCGCAGCACCATTAAG                                                   | RT-PCR/RIP        |
| MIR172b-qR                                     | TTTGTAGCCGTCGATTGTTG                                                   | RT-PCR/RIP        |
| MIR319a-F                                      |                                                                        |                   |
| MIR319a-R                                      |                                                                        |                   |
| GUS-F                                          | CGATGTCACTCCGTATGTTATTG                                                | RT-PCR            |
| GUS-R                                          | CAGTTCTTTTCGGCTTGTTGC                                                  | RT-PCR            |
| UBQ5-N                                         | GGTGCTAAGAAGAGGAAGAAT                                                  | RT-PCR            |
| UBQ5-C                                         | CTCCTTCTTTCTGGTAAACGT                                                  | RT-PCR            |
| <b>Primers for <i>in vitro</i> RNA binding</b> |                                                                        |                   |
| T7miR162b-p3                                   | TAATACGACTCACTATAGGGAAAGAGTGAAGTCGCTGGAG                               | pri-miR162b Probe |
| miR162b-p4                                     | CATGAAGAGCAAGCAGCGCTGGATGC                                             | pri-miR162b Probe |
| T7-premiR162bF                                 | TAATACGACTCACTATAGGAGGCAGCGGTTTCATCGATC                                | pre-miR162b Probe |
| premiR162bR                                    | CTGGATGCAGAGGTTTATCGATC                                                | pre-miR162b Probe |
| T7-premiR172bF                                 | TAATACGACTCACTATAGGG GTCGTTGTTTGTAGGCGCAG                              | pre-miR172b Probe |
| premiR172bR                                    | TTTGTAGCCGTCGATTGTTG                                                   | pre-miR172b Probe |
| UBQ5T7F                                        | TAATACGACTCACTATAGGGATGCAGATCTTCGTGAAAAC<br>C                          | ssRNA probe       |
| UBQ R2                                         | GGATTCCTTCCTTGTCTTGGA                                                  | ssRNA probe       |
| RNA/RNA blunt 1                                | TAATACGACTCACTATAGGGCAACAACGTCTCTTGGATCG<br>TATATTGCCATTTATGTGTTGAGCCC | dsRNA probe       |
| RNA/RNA blunt 2                                | TAATACGACTCACTATAGGGCTCAACACATAAATGGCAAT<br>ATACGATCCAAGAGACAGTTGTTGCC | dsRNA probe       |
